# Supplementary material for: PD-L1 expression in keratinocyte and infiltration of CD4 + T lymphocyte can predict a severe type of erythema multiforme major induced by the anti-PD-1 antibody, pembrolizumab
Source: Springer Nature journal article supplement (doi:10.1007/s13691-024-00676-4), 2024-03-29

## Supplemental Figure

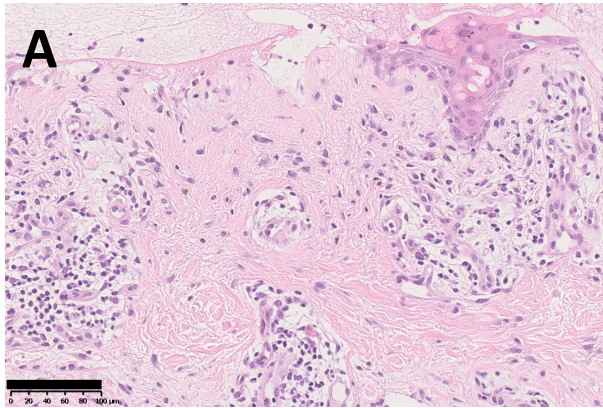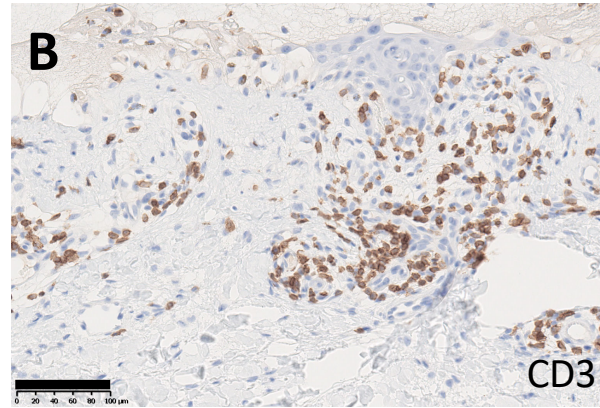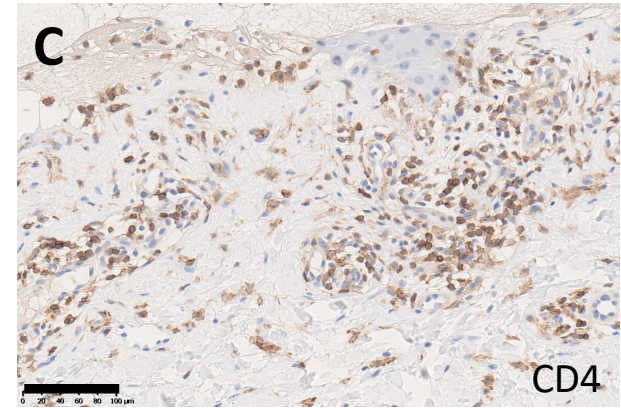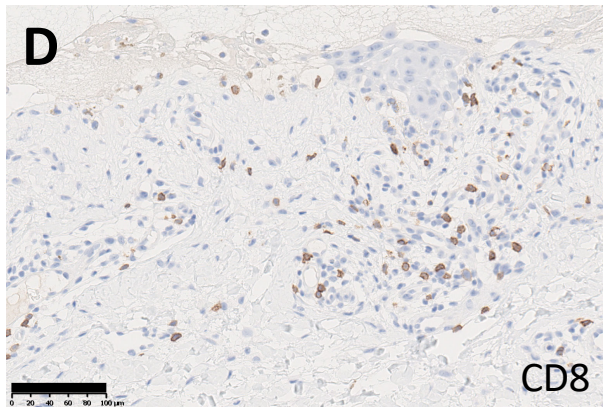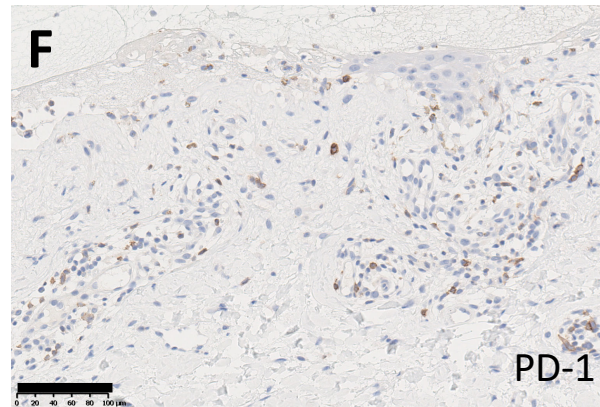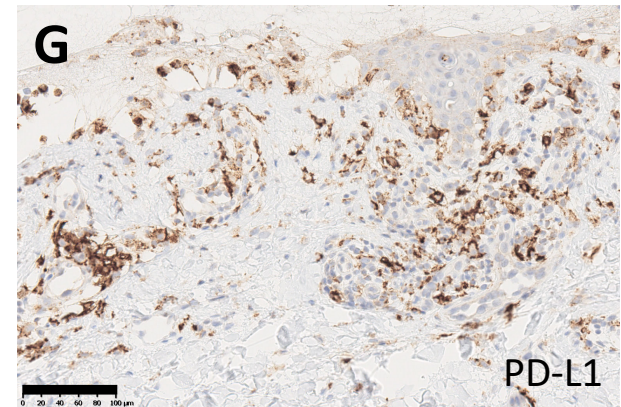

Supplement: MOESM1 [file 26920630]
